# Supplementary material
Source: PubMed Central journal article supplement (PMC3286313)
Supplement: supp_111.186957_JPET186957_Supplemental_material.pdf [file supp_111.186957_JPET186957_Supplemental_material.pdf]

Supplemental material for:

**Cobinamides are novel activators of the NO receptor targeting the sGC catalytic domain**

Iraida Sharina, Michael Sobolevsky, Marie-Francoise Doursout, Dorota Gryko and Emil Martin\*

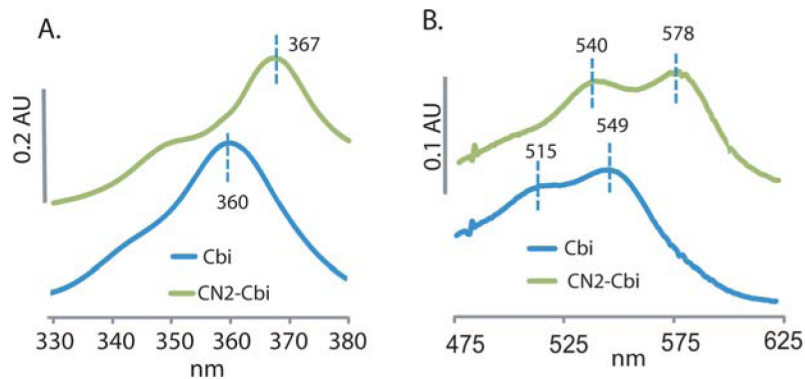

Figure S1

**Supplemental Figure 1. Changes in spectra of CN2-Cbi upon conversion into Cbi in acidic conditions.** Cobinamide (Cbi) was obtained by removing the cobalt-ligating cyanogroups from dicyanocobinamide (CN2-Cbi) using a treatment with low pH and nitrogen purging as described in Material and Methods. **(A)** and **(B)** are UV-Vis spectra of 4  $\mu$ M solution of CN2-Cbi (green) and Cbi (blue). Vertical lines and numbers demark the wavelength of the peaks characteristic for each compound.

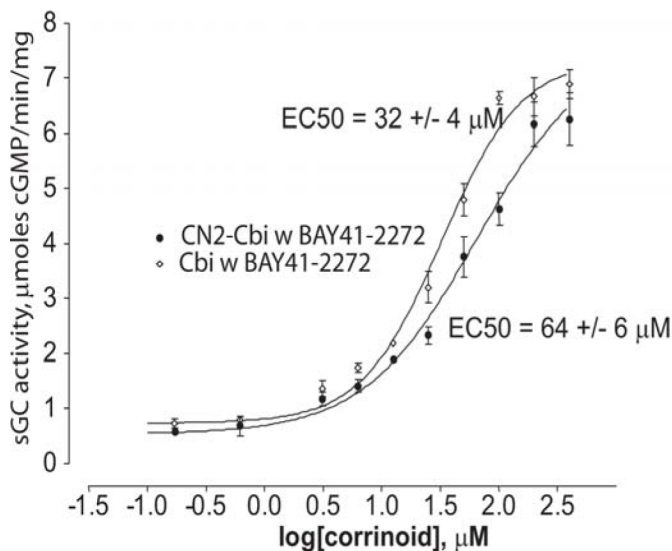

Figure S2

**Supplemental Figure 2. Comparison of sGC activation by CN2-Cbi and Cbi in the presence of BAY41-2272.** Concentration-response curve to CN2-Cbi (●) or Cbi (◇) in the presence of 2  $\mu$ M BAY41-2272. Cbi has a lower  $\text{EC}_{50}$  than CN2-Cbi. Data are mean  $\pm$  SD from two independent measurements performed in triplicate.
